# Supplementary material for: GAME9 regulates the biosynthesis of steroidal alkaloids and upstream isoprenoids in the plant mevalonate pathway
Source: PubMed Central journal article supplement (PMC4756317; doi:10.1038/ncomms10654), 2016-02-15
Supplement: ncomms10654-s1.pdf [file ncomms10654-s1.pdf]

## Tomato Chromosome 7

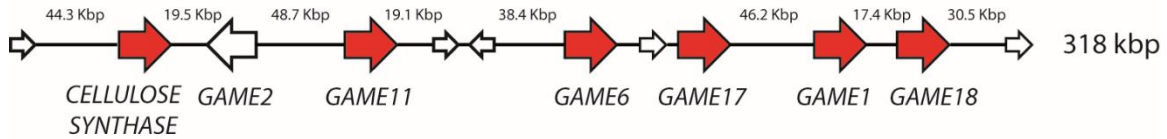

**Supplementary Figure 1.** Schematic map of altered SGA-related genes in tomato *GAME9*-RNAi and *GAME9*-Ox transcriptome.

Among a set of 27 common genes in the *GAME9*-RNAi and *GAME9*-Ox tomato lines, we found a significant representation of SGA biosynthetic genes (*GAME*'s) located in chromosome 7 (*GAME*'s- 1, 6, 11, 17 and 18) and a *CELLULOSE SYNTHASE*. Altered genes in the region (spanning ~318 kbp) are highlighted in red.

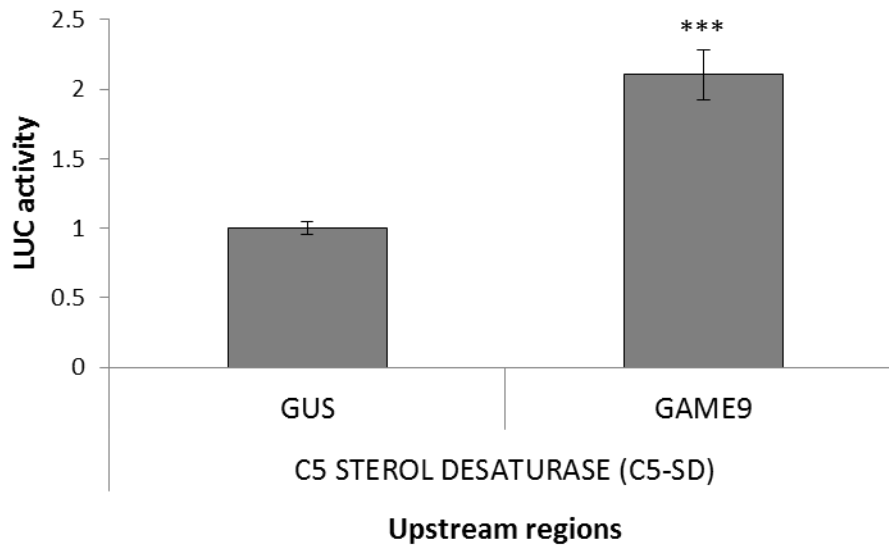

**Supplementary Figure 2.** Validation of transactivation assays of putative downstream gene promoters by the GAME9 transcription factor.

Validation experiment (n=8) was performed, confirming the transactivation of the *C5-SD* promoter. Values in the y-axis are normalized fold-changes relative to protoplasts cotransfected with the reporter constructs and a pCaMV35S:GUS (GUS) control plasmid. For the normalization procedure, see Materials and Methods. Details for each promoter are provided in Supplementary Table 7. Student's *t*-test was used to assess whether the transgenic lines significantly differ from wild-type plants: \*\*\*P value < 0.001.

### ***Δ(7)-STEROL-C5(6)-DESATURASE (Solyc02g086180)***

>SL2.50ch02:48924609..48928542

```
CACCGCCGTGGAAGTTTATTCACGGATATTACCACGAACTATTAATTTCTCTCTAGATCTCTCATCTCTCTCAAAAATCTTATATTTTCATTTA
TCAAGTGTGTGAATTGCATCCTAACAACTATACGAGTAGAACTACCTAACATTTCAAGTAGCGGCATGAAATGTCTATTTAGGCTAAAAACAAA
GGACCACGAGGAAAATAACAACGGAGAGAGTGATTTTATAGCCCTCAGCCAAATAAATAAATAAATAAATAAATTTCTCTTTGGCCGGCCAAGCTAG
TTTCAATCTTCGAAAATAATAGATATTTCTTGATAAGAAGGTTTAGATCCATAGCATAGGTAACATGAGAAATATGAAAATTAATATCATATAATAT
ATTTAATTTAATTTGTAAATTGAATCTACAAAATAATGATGATGCACATTTAATATTTGTGAATGTTGAAATATTGTTTCATTAGACTGATATGA
TAGATTGCTAAACTAAATCTCATAATATATATTACATTAAGCTCAAATAATCTCTTTGATACTATTTCCATAGAACGAATGTGCATTAACAGAG
GGGAAAGGAGAAAGACCACATAATGATTAATCATAGAGATGATAATAAACCAACAAAAAAGACAAAAGTAGAACAGCCAACT
TATGAAGGCCATAATAACCATATAATAAACAGACAAAATTTAATTTTTGAATTTTTAATGTAGTCGAGTTTCCCCCTTCAAAAATTAATTTGT
GACATCAATACTGCAACAAGTGGCTGGTTAGTTCAACACAAGTTAAAGGAATAACACAAACAACTTTTCATCTAGTTATATCGTTTTAGTAAAA
TGGACATAAGTTATTGCTTAAATCCATAACTGTTTATATTTCTAAAAGTTGATACATTTGTTTATGAAAATCACTTAATAGCTTAATGTTAGATG
TATACATATCACAAATTTAGCTAATATCAAAGTTAATTTGTGTCTAACTTTTTATATATCTACTCGATTTTCAATAGTATCTAGATTAATGAAACA
TGACAAGGTGAATTCAACTAAGGATTAATAAAGCATGATAAGATTATTAATAATATATTGTTATCAGTAATATTTCTCGATTTATTA
TTACATAATTTAATAAATGTATGAAATATTACTCTAAAAAAGTGAATGATAAAAAATAAATGTGAAATCTATCATATTTAAAAATAT
TAAACAAAATAAATCAAACGAACGATCTTATTAGAATCTTTGCCAGTTTAGCTCACCACACAAACACGTGGAGTAGTAGTCCAAAATGGAATCAAT
TTTCATTAATAACGGCTGGCCACATGCATATAATTGTGTACCGCACTAGCCCTCTTTGTTTCTCTCTATCTTCACTCCATAGTTCCTCTTTCCG
GCGGACCATCGCCGGGAGTCTGGTAAAACCCGACCCGAGACGGACATATTTCTTTTACCTAGTATACCGTCCGGAGATGGAGGATTACTTGAA
GCTATTCGTGGAGGAGACATCGTTTTACAACCGTCTGGTTTTGGGTACATTTGCCGGAATCATGGTGGGACCACCTTCTCATATGCTTCAAGGA
TGCTCCGTAACATTTGGCGGTGTTTACTTTACTTCATCTCCGTTTCTCTGGTGCTTATATTTCACTTGAACGCAATGTCTATATCCCA
AAGATGCCATACCATCAAAGCAAGCAATGCTGTTGCAAAATACAGTTGCTATGAAAGCTATGCCGTGGTACTGTGCCCTTCCATCCTTTCTGAGTA
CATGATTGAAAACGGATGGACCAATGTTTTGCGAGAATAAGTGTGTTGGATGGCCTACCTACATCATCAATGCGGCTATTTATCTTGAATAGTG
GAGTTTGGAAATCTACTGGATGCACAAGTTATTGCATGACATAAAACCTGTATAAATATCTGCATGCTACACATCATATTTACAACAAGCAAAAACA
CACTTTCCCATTTGCTGGATTGGCATTCCACCCATTGGATGGAATACTGCAGGCAAGTCCACACGTTGTAGCTCTTTTCTGGTGCAATGCATTT
ACTACACACATAGTCTCATATTCGTGGAAGCCTTATGGACGGCTAATATTCATGACTGCATACATGGTAAGGTGTGGCCTGTAATGGGTGCCGGT
TATCATAACCATTACCATAACAATACCGCCATAATTATGGTCATTACACAATATGGATGGACTGGATGTTTGGAACTCTTCTGTATCCCGTTGAAGA
GGATGCCAAGAAAATGTAATGTGTCATGATTTGCACTCAAGGATGTTCTTATTGTTTCATTGTCCCAGCAATTTATCTCGTGTTCATCGTTGGTGGGA
TGTAATTTTGTATGATGATGATTTATGTGAAAACAATTTGCTTTTATTGCTTTTCTCCCTATATATTTAATAAAGCAATAAATACTGTGGGGAAG
AAAATTCAGTTTCTAACTTTATGCCGGAGTCTTTGAGGTAATCATATAACGAAAGCTAAATGTGAATCACATTTGCACCATGTTATGGTGATA
```

### **Supplementary Figure 3. G-boxes and GC-rich motifs found in the promoter of the *C-5 SD* gene.**

Three GC-rich boxes in the promoters of target genes are known to be bound by group IXa ERFs (Shoji et al., 2013). A P-box recognized by all ERFs, except clade 1 AtERF1; a CS1-box bound only by clade 2-3 ERFs (e.g. ERF163, ORCA3, AtERF13) and a GCC-box bound by all, except clade 2-1 ERFs (e.g. ERF189, ERF115). The presence of G- (blue), P- (green), GC-rich boxes (yellow) and the 5'UTR (pink) present in the promoter construct used in the transactivation assays (~1,550 bp), and the coding sequence (red) are highlighted.

**GAME4: CYP88 (Solyc12g006460)**

>SL2.50ch12:941286..934011

GAGACTTGAACCTTCTCTTTCTGGTGGGCTTCCAAATTAATGCAATCTATTCGCATAAATAATCAAAATGAGATTTCTAACTAACACATCCATAAT  
ACTACATGTATATCTAGACCTAAACCTCACAAATCTATAAAGTTTCTAATCTTGATGCCAATTAATACGTCATTCGCATAAAATTTAAATTTTA  
AGCTTAGAGTTGAGTCTCACTTTCTCCAAATATAATATAATTAGTGATATTCATAATAATAATACATCTAATATTTAATTAGATATCTCAATATATT  
AACTTAATTAACCATGTGATAACATATAAAAAAATCAAAACCCCATGTGAGTCTGGCGCTAATCTACCACCAAAACAATATGCATAAATTTT  
CTTGCCCTAATTGAAATAATATGACATCATTCTTTAAAAAATGACAATCACCATGCTATGATTGCAAACCAATGTGATCTTGGAACAATAAAAT  
AATATATAATTTTTCAGCGTAATAAATAAATATAATTAATAAAAAATGTTAAATCTTTATCGGTATTAATTAATGTCATTAGATCCAAATATATTTAA  
GCCTTTAGGTCATATAAAATGAGTATTAATGCCATTAATAAATGAAAAATTAACAATAATTTCTAATTAATACCGCTAAAAATTCACACAAAAATAA  
ACAATGAATAGCCATTGCTCGAATACGGTGCTTTACTCCAAGTCACACTTAACCTCAATTTAATTTGATTCACTTATACCTATGGGTCAAAGTGATA  
GAGGATTAATAAAACCAACTGAAATAATTTAAAAAATACTCATCACTAAATATTTTAGTCAAACCTGAAATAATTTAAATTTTAAATCAACTTT  
ATTGACTAATCAAAATGACTCGGCAACTATCGAAAGAAATAAAAATTTTTGAAATTTTTTAAAAATGGCCTTTTCGAGTCGTTATATTTAG  
ACCAATAACAAAAAATTCACAAAAAGCAATAACATAACATTTGATTGTTCTTTTATTTTTTAAATAATAATTTGCATAAAATATGTGCAAAA  
TTTTATATTTTTACAGAAGGATATAATATGGTATGAAAAATGGGTTTTATAAGTAAATATGCTTAAAAGCTAAAATAACAAAATTAATAGTGTGA  
TTGACTAAATTTTTTAGAAAAATATTATAGAAAAATCTTTTTATCAAAATATTTTGTATATTAACAATTTTTGTTGACTAATTTTTTTTTGATTAA  
TATTAGAGTTCTATTAGTCTGATCAAGATTTCAAATTAATTTGTTGTTCCAATGATAAAATGTGATTGATTTTTAACTATTTAAATAGTTTTTT  
TTGAATCTGATACTACTAATATTAAATTTAAAGCCAACACCCCGCAAAATAAATCTTTCACGTGACCAATGCATCAAGTGGAAATTTTAAAAATTA  
TACGACAAGATATGTAGAAAATTTAGTTACAAAAATAGAAAGAAACAAAGTCCATCTTTGAAATCTCTCACATAAAATATTGGGACCAACGTTA  
GAAACATTATTGTTATGGCAAAAGAAAAATCGGTTATCATCGAGTATCTGATCCAGTAGATAAGATTATTTCTCTCGTAAATCGTAGGTTTTGAAT  
TTGATTTTTAGTATTAATAAATTTTTGGTAAAGAAATGCTTTCCCTATCTTCTAATGGAATCCTATGTAGCGCGAAATTCGAAATAGTCTAATTT  
AATTTAATTAATAACACAAAAATGAAAAATAAAAAAATCCTCATTTTACTAATAATCATAATAATGATGTAGAAAATATTAGCTAATCCCAAAAT  
ATTAATCATAAAATAAATTAATAATCAAAATAATATATATAAACCACCAATCAAAACAAAAATCATAGTATAAGACAGTACAACAAG  
TGTAAAGTTGTGTAAGGCTTTAGGTTTCTAGTCAAATAACTATGATTTTTCTCAAAATATCTTAAAGAAATTTATATAATAATCAATATATGATT  
TTTTATTTTTGGTTATTTATTTAGTTTTCCCTTTCTTTAATTTTTCCATACCTTTGTCCGTAATCATGGACCATATCATTATTTGTTAACTG  
AAATGACAAAAATAACCAAAATTAACAGCTAACATAAATAAGTTTTCTCAAAATCAACAACACATTTAAACCTTTTCATTTAAAAAACAAT  
TTCTTTAATAATTTTCAAAATCGAAAATATATTTAGTTTATCAATAATGAAACCTTTAACGAAAGTTGGGGGGCTAAATTTATTTTACGTGATTGT  
ATTTTTTTTTAATTGCATTTCTATTAAGGAATAAAATATAAAGATTTAACTATCTTTGAAAGTAAAAAGGTTAGTATTGCTTTTACATATTTGGT  
CTCATCAATTTGTTGCCATATTTTTTAGATAAATAAATGTAGCCATTTACTACCTCCAATCAAAATTCACAAATCCATCCAATTTCAAAAGAAAA  
AAAAATAGAGAGAGAGAACAATGGATTTCTACAATTTAGCCTTGTCTTCATAGCTTTAATACTTGGAAATTTTACATTTTATGCCATATTAATGAGAA  
TAAATGGTTGGTATTATGCAATCAAATTTGTTCAAAACAATAACATCCCAATGGTTATATGGGTTGCCATATTTGGTAAACACACTTTCTACT  
TCAAAGCTCAATGTGTGGTGATCCAAAATCATTATTGATTTCTTGTCTACTAGGTTGGAGAAAGGAGGAATGTATAGGGCATAACATTTGGGAA  
GCCAACAAATGTTGACAAAGCCAGAAATAATAGAAAAGTTTTGATGGATGAAGAGTACTTGAAGAGGTTTGCCTAATTTATGAAAAAAT  
AATTGGATTAACAACCTCGATAGAAAGAAAGCAAAATTTTTCGTAGATTAACAGCACCAAGTAAAGGATGATTTATCTGATTTATCTCGATTAT  
ATCGATAAAACTGTGAGTTCTACATTAGAGAAATACGCTACTCGGAAGAACCTGTTGAGTTTCTCATAAAATGCACAAGCTTACGTTTGGAGTGT  
TTATGAGACTTTAATGGTGATGAAGTAAATCAAGAATTTTATGATGAAATGTTGAGGAGATTACTGCTGTAATTAGTGGTTCACAAATTTGCC  
AATTAATCTCCAGGATTTGCTTATCATAAGGGACTCAAGGCTCGAAAAGTACTAGGAGAGGATTTAAAAAATAAATTGATGAAAGAAAGAGAAAG  
CATGAAGGATGGAAAATCAATGCCAAAGGCAACATAATGATATGTTGTTATCAAAACAACAAATCAAGATTATGAAGCAAACATGTTGAGTGACAA  
GAAGACTTGAATCCTAGTTTTGTTTCTTGTGCTGGTTTTGAACCTGTTGCTCTTATGCTGCAAGGCAATTTCCACTTACAAAAACATCCACA  
TTTTCTGGAAAAAGCCAAAGGAAAGCAAGAGGAAATAGTAAGAGAAAGAGACATCTTCAAATGCTGGACTTGTATTTGATGAAATTAGACAAATGA  
CATTTGTTAGTAAGATAAATAATGAAACGTTACGTATAGCTACTGATCAGTCGGTATTCCTTAGAGACACAAGTACTACTTTAAACATAAATGGGTCA  
ACCATCCCAAGGGTGGAAAGTTTTTGCAGTTGATGGAATATTCATATGAATCCTGATGTTATGTTCAACCTAAGGAATTTAATCCTTCGAGATG  
GGATGATATTGAAACTAAGCCAGGCATTTTTCTACCTTTTCAATGGGCCCAATCATGCCAGGATCCAATTTGGCCAAGCTTCAAATTTCAAGTAA  
TTCTTCAATATATCTTCTTCACTACAGGGTTGAGCAAAATAATCCAGAGGCTAGATGTTATCTCTGAAAAATGTCTTGTGAAATTCAGAAAGCTA  
TCGATCTCTAGTAATGGTAATTA

**GAME7: CYP72 (Solyc07g062520)**

>SL2.50ch07:65217385..65223561

GGTACAAGGACTAGCAGCCTATGAGGAAGACAAATGGGCCAAACATAGAAAAATATCAATCCCGCTTCCATCTAGAGAAGCTAAAGGTTTGCA  
GACGTTTCTCGTTTTCTCCTTTAACGTATGACTATTTCTAGTAAATTCATATTTGTCAGACTCTTCTACAGTCTATGTAAGTTTCATAGGCTTGG  
ACGGGCCATTTAGTCTATGTAAGTTGATAATGCTTAGATATATTACCGTAAATGAATCTTTTTATATAAAGAGATTTGTAATATTTGCTGACGTT  
GTTTTACCTTAATTTGTTTGAACGCTCTTTCTTTTTAACTAGATGGTGATGGTATCACTATATCTGATTTCTAATTTCTGATTTTCAAGTGTG  
TCATCGTTATATGTTCCCTTACATCATTTTCTCGAACAGCATATGCTTCCAGCTTTTCACTTGAGTTGATGAGATGTTGAGTAAATGGGAAGACGC  
TGTTGAAGGCTCTTGAGATAGATGTATGGCCTCACCTCAGCAATTAACCTGTTGATGTGATCTCTCGTACAGCTTTTGGTAGTAGTTACGAAGAA  
GGTAGAAAGATTTTTGAACCTCAAAGGGAACAAGCTCAGCATTTTATCGACACTGTACGCTCAGTTAATATCCCAAGATGGAGGTAATTAATTTG  
CTGAGAAATCGAAAAATGTAGCCAAAGCTATGTTGTTCCGACTCTAAAAATGATGATGGTTGCATGTTGGATCTTCCAAATATTAGTGCATTTCTA  
TAGAATCCGACATGGTTGCAGGAATTTTTGGAGAGTCCGAACAACATAGAACCAAAAGTTCAACAGGAGATGCATAGCTTTTACTTCATCTAAT  
GCATTTTGGTTTTCTGCTTATAATAATTTCAAAGATTTTTGCAACAAGAGGAACAGAAAGTAAAGGAAATAAAAAACGAGGTTCCGACCTC  
AATGAAAGGTATTATCGATAAAAGAAATGAAGGCAATGAAAGCAGGTCATGATGCCGATAATGAGGATCTGTTAGGCGTATTGCTTGAATCAAATTT  
CAAAGAAATGAACAGCACGGAACAAGGATTTTGGAAATGAGCATCGAAGAAGTCTCGAAGAATGCAAGTATTCTATTTTCTGCTGGCCAAGAAA  
CTATAGCAGCTTACTCGTGTGGACTCTGGTGTGTTAAGTAGTATAAAGTGGCAGAGACAGGCAAGAGAAAGTCTTCCAGATGTTTGGGA  
TCGGAACACTGATTTGATGATTAATCATCTAAAGGTTGAGTATTTCTTTTTTAAATTTTAAATTTTCTGTTTGGTTAGTTTCAATGATTTCTCTC  
TCATTTGTTATTGCTATTGCTTGAAGCTTTTGTACTAATAATGTTTCTTGTCCACGACCCAGATTCTAAGCACTGGGCGTAGGTTGGGTTGTTAA  
GATGGAGCAGATTTCTATAAAGCTTGGTCAATCCTCCTCTTTGAGCTAGCTTTTGGGTTGAGTATGAGCTTAAAGCCTAATTTTCAATTACAA  
CTTGAACCTTACAAGCTAACGATGATCTGTACGAGTCATTAGATATAACTGAAGAAGAAGCCTTTTTTTTGCAGGTAACGATGATCTGTACGAGT

CACTAAGGCTATATCCCATTATTTACACATAACAGACAGGCAAGTGAAGACACAGTATTAGTAGAATTGTGTCTACCAGCTGATGTGCTAGTTTC  
ATTGCCACGATCATATTGCATCATGACAAAATATATGGGGTGAAGACGCAAAACAAGTTCAATCCAGAGAGATTTAGAGAAAGGAATATCAAGTG  
CAACAATGGGTAAAGTTACATATTTCCATTTTCATGGGGTCCAAGAATATGCATTGGACAAAATTTGCAATGTTAGAGGGCAAGATGACTCTCTG  
TATGATCCTACAAGCTTCTCTTTGAATTGTCTCCATCCTACACACATGCCCTCAACCCTACTTACCATTATCCTCAGTATGGTGTCTCTTATT  
TTCCACAACTATAATTTACATATTACGTGAGGTATCTTTCACCTGTACGACTATACTGGATATGTTATTGTTACAGACAAACTCAATAACTCTTGTAA  
ACCTTTTATCTGTACCAGAGAATAAATAACATGTTGCAAATTATACAAATCATCTCAAGAACCAATGAGAAGCTTATTGTTATGACAAAATTTAGAT  
ATATTTACAAAACATTAAGCTAAAGAAATTTGTGAAAAAATAACTGTTTTTTTTTTTGGTCCAAATAAAAA CATGTGCATGCTAGTAAGCAGTAA  
GCACAGCCGGCTTTTTGGCAATGAAACCACTACATACACTGTACACTAATCTTTTTTTCATTTTTTAACTAAAAATATGAATGTCAGAATACGAAA  
TAACAAGTAAAAACAAACGAAAATGATTAATAATAAGAGAAAATCAGAGCCACTATTGGTGTCTTTGCTCATCATTGTTGACGACGCTGTTTTGT  
TAGTTCACAGAGACATAGTATATATAAAATTAATACTCCTCGTTTTTTACACACAAAATCAACTCAAACAAAATGGACGAAATCAAATATTAGTAAGA  
GTGTGTTGTTCTGCCATAGCAATTGCTCTGTTGTGTGTCTGTGGAAGTACTAAATGGGTTTGGTCAATCCGAAGAAAGTTGGAGAATTTGTTGA  
GGAAACAAGGGCTAAATGGGAACTCTACAAAATATTGTATGGGGATTGAAATGATTTTATTGGAATGATTAGGGAAGCTAGTTCAAACCTATGA  
ATTTGTCTGATGATATAGCTCCAAGATTGGTGCTTTCTTCTGAGACCACCAAGAAATATGGGAAAAATGTTTTATATGTTGGTCCAAAAACC  
ACAAGTAATAATCATGGCCCTGAGCTTATAAGGAAGTACTCTGAAAACCTATTTGTATCAAAGCCCGTGGAAATCCATTTGCAGCATTATTG  
GTACAAGGACTAGCAACCTATGAAGAAGATAAATGGCCAAACATAGAAAAATTAATCAATCCCGCTTCCATCTAGAGAAGCTTAAGCATATGCTC  
CCAGCTTTCACTTGAGCTGTACTGAAATGCTGAGCAAATGGGAAGTGTCTTCCACTGGCAGCTCTCGTGAATAGATGATGGCCTCACCTC  
AGCAATTAACCTGTGATGTAATCTCTCGACAGCTTTTGAAGTAGTATGAAGAAGTAGAAAGATTTTGAACCTCAAACGGAACAAGCTCAGA  
ATTTTATCGACGCTGTACGTGAAGTTTATATCCAGGGCGGAGATTTTGCACAAAGAGGAAACAGAAATGAAGGAAATAAAAACGAAAT  
CGGACCTCAGTTAAAGGTATTATCGATAAAAGAATGAAGGCAATGAAAGCAGGGAAATGCCGATAATAATGAGGATCTGTTAGGCATATTGCTTGA  
ATCAAAATTTCAAAGAAATTTGAACAGCACGGTAACAAGGATTTTGGAAATGAGCATCGAAGAAGTCAAGAAATGTTCTAATTTGCTGG  
CCAAGAACTACATCAGTCTTACTCGTGTGGACTCTGGTGTGTTGAGTCGGTATCAAGATTGGCAGACACAGGCCAGAGAAGAAGTCTTGAAGT  
GTTTGAGAGTCGGAACAGATTTGATGGATTAATCATCTAAAAGTTGTAACAATGATCTGTACGAGTCAATACGGCTATATCCCCATTGATA  
ACACTTAATCGACAGGTTAACGAAGACATAGTATTAGGAGAATTGTGTCTACCAGCTGGTGTACTAGTCTCATTGCCAATGATCTATTGCATCATG  
ATAAAGATATATGGGGTGAAGATGCAACAGGTTCAATCCAGAGAGATTTAGAGAAGGAATCAAGTGAACAAAAGGTAAGTTACATATTTT  
CCATTTTATGGGGTCCAAGAAATGCAATGGACAAAATTTGCCATGTTAGAAGCAAAGATGGCTTTGTGATGATCCTACAAAGCTTCTCTTTTGA  
ATTGCTCCATCTACACACATGCTCCTAAATCCTTAGAACCATGCGCCTCAGATGGTGTCTCCACTTATTGACAAAATTTTGTGTAATGT  
AATGTAACAAGATTAATAAAGACTCAATAAGGGG

**SSR2 (Solyc02g069940)**

>SL2.50ch02:39361119..39357631

GGGCGTTTGTATGGTAGGGCTAAAAGGTGGGCTAAAGATATAAATCACACTTACAAAATGATTTGGATTTTTTATATTCATTTTCATCTTTAAATAT  
ATATAAATCATATAAGACGGAGAAATATTGAAAATATTACATAAATTTAGCAAGTTTTAAATTTAGTTATAAGATTCAAGATGTACTATTTAAATAT  
AATTAATAAAGTAAAAATATTTTTAATAATTTTACATATAATTTAAAAGTGTATTTAATACTTAGCTTTTACGATTTTATCGATGCTCTCGCT  
ACCAACCAAATAACATGTTTTCCGTAATACCCCTATTGTTGAAGTCTCTATAAAGCACACTATCATCTTAACTAAACCATCTCTCATTTTGGGG  
AGTAACTCTGCAATCCAATATTAGGTACTCATTTCATCTCTCTCAATTTTTCTCACTATGATTATTATTTGTTAAATTTAAGCTAATTTTATAG  
CTATTTATGCATGAAAAATCATAATTAGTGTTAAGAATCCGGTAGTTAATTATGCTTTTCTTTTGTACAATGCATGACATAGTTAGAGTAGAACAAA  
TTTTCTGTAAGAACAAATTAATTTGTTGCGGAATCAGTTGATAATTTGAAAGTGAAGAGCATAATCTTATTTTTGGTAATGATAAGACA  
TATACTAGTAATTTTGTAGTTTGCATATCAAAGAAAAATGTTATTAGTTGAAAAATTTGTTGATATATAGTCAAATTAATAATTTAAAGCTTG  
GATATTTTACATAAGTTAGGTTTGAACCTGCTCTGTTTTGTTTTACTACTGTTCTCCCTAAATTTGAATAAATTTAGAGAAAGCGGAATGGATTA  
TTTCTCTGAGTTTTTTTTTCTGAATTTTCTATGTTTTTTTTGTAATATGGAGGTAATTTGTCAAAGGTTTAGATGATTTTTGGAAGACAAC  
TTAGATTAGTGTGTTAACGATTAATTAGTATAAGTTGAGTGACCATTCAGATTTCAACTCCATATTTAGTCTATTTTACCTTTACATCGTTGATT  
TTCAATGATAATTAGTAAACAAGAAATGGCCATGGTGCATGAAATTTCAACTTTGATTTTCAAGATTGTACTGAACCTGGCTTTTCCGGGATGCTG  
TGTTGTTGTAATCTGACTGTCAATAGCATTATGTTTTGGGAGAGGTTTCAATTGATGCTATTTGTGCTTAAAGTTTGTAAAGTAGTCTCAATT  
GGTAGTGTGATTGATGATAAGTAGTACATTTCTGGCTGTGGTCTTAACTTGGATTGCTCGTTGTAACAGTTGTTGCTCTCAAGTTTCAAGATGTC  
GGATGCTAAGGCCCCCGTGGCCACTGCTACCCTAAGAGGAAGATCCAGTTGGTGGACTTCTTCTTCCGTTCCGATGGATCATTGTCTCTTTTTG  
TCCTCCATTCTCGTTCTGTATTACTTCTCGATATATCTAGGGGATGTGAAATCCGAGAGGAAATCTTACAAGCAACGCCAGATGGAACACGATGA  
GAATGTTAAAGAGGTTGTGAAGCTCTTGGCCAGAGGAATGCAGAAAAGGATGGTCTTGTATGCACAGCCAGACCTCCTTGGGTGGTGTGGAA  
TGAGAAAATGTCGACTATAAACAGTCTCGTCAATTTGAAGTTGACTTTCAAAGTTAGAAATATACTTGATAATTGACACGGAGCGGATGTTGCTAA  
AGTTGAGCCTCTAGTCAATATGGGCCAAATGTCAAGGGTCACTATCCCAATGAATCTTCCCTTGCAGTTCTCGTGTGAGCTCGATGATCTTACCCTG  
GTGGTTGATCAATGGGTTCCGGGTTGAAGGAAGTTCTCACATATTTGGGTTGTTCTCTGACACTGTTGTAGCACTTGAAGTTGTTCTAGCTGATGG  
AAAGGTTGTTAGAGCTACAAAGGACAACGAATTTCTGATCTTTCTAGCTATTCCGTTGGTCTCAAGGAACATTGGGGCTTCTTGTTCAGCTGAA  
ATCAAGCTTATACCAGTTGATCAATACGTGAACTTACCTACAACCTGTAGGGGTAATCTTAAAGAGCTTGTCTCAGGCTTACCGGATCTTTTGTG  
CCCTAAAGATGGAGATCGGACAGCAATCCTCTAAAGTTCTGAGATGGTGAAGGCAATGATTTATGGTCCAACCGAAGGGGTTGATGACCCGGT  
ATGATGCTTCCGAGGAATGAAGCCAACGAAGGGTAATGTAATCAACAATTACGGTTGGTGGTTCAAACCATGGTTTTACAACACGCTCAAACC  
GCACTAAAAAGAGGGGAATTTGTTGAGTACATTTCAACTAGGACTACTACCACAGACACAGAGATCGTTGTATTGGGAAGGTAACCTAATCTT  
CCATTCGGTGATCAGTTCTGGTTTAGGTTCTCTTAGGATGGCTCATGCCACAAAGATTGCTGCTCAAAGCCACAAAGTGAAGGCTATTAGAA  
ACTATTACATGACCATGTCATTCAAGATCTCCTTGTCTCTTACAAGGTCGGTGAATGTTCTGAGTGGGTTTATCGCGAGATGGAGGTATAT  
CCAATTTGGCTGTGCCACACAGAAATTTACAAGCTGCCAGTGCAGACCAATGATCTACCCTGAACCAGGATTCGAGAAGACAAAGGCAAGGCGTA  
CACCGAATATGCACAAATGATACTGATGTTGGTGTACTATGTTCCGGGAGCAGTCTGAGGGGTGAGCCGTTTGTGGTTGAGAGAAATGCC  
ACAACCTGAGCTTTGGTTGATAGAGAACCATGGATTTCCAGCTCAATACGCGGTGACTGAGCTGACAGAGAAGAAATTTCCGAGGATGTTGATAA  
CGGTCTGTACGAGCAATGCAAGGAAGTACAAGCTATCGGAACGTTTCAAGTGTGACTATAAATCGAAGAAAGGAAGGAAGACAGAGAAG  
GAAGTGCAGGAAGCTGAGCAAGAGAAGCTGAACAAGAGACTCTGAATTTGGTTTCTAGTATGAATTTTCCGCTTTAAATAAGCAGCTACATTGA

ACAAGTATTTTACTAGTAGTAAGGTCTGCTTCCAAATTCAAAAATGTTTCAAATAAATGGCTAGTGCAGTTCAAACCTCAAGTTTC  
ATTTCT

### **HMGR1 (Solyc03g032010)**

>SL2.50ch03:4510928.4506920

CCAATCTACCCAGCAGAGTCGCCATTTCTGTTTTATCGAAAAATATTATTTGTTTTGAAAAATTTTTACTTTTATAGAGTCGCCACTTAATTATTGAGAAA  
AATCAAGAAAAATAACGTTTCTAAAAGACTTATACAGATAAAATCATTGAAAACATTTTTAGGGGAGTCTGGATTACATTAATATTTTAGGAA  
TGTGTTAGGCCCTTAAAAATATCCGCTAAGTTCGCGTTATCGATAAACTAACTTAACTTGGCTAAAAATTTAAATTTGTGATCAGATATTTCTTGGAGTTG  
TTTAAAAATGAATGTCAAAAATCATTAAAGATTGTTTTGAAAGTGAAAAATTTTTTCTAAATGAGTTTTAATTTGTAAAAATCTTTAAGCCATTTACT  
TTATTTGATCGAATCGTAAAACTAAAGTGGCGTTTTGTGGGGATACGGATTACTCTAACTTTAACTAGCGACAAAACAAAACAATAATTGAA  
AAACATATAAAGAGGGAGAGAGATTGGGTCCAAATCTTGATTTTCTGTTCCGCTTGATCAGAATTTTGGACCCACCTATTTTGGGTTTTTGGCCAT  
TTGACTTTCTTCGTACCTGTGCTAGACTAAATGATAAAAAAATAGAGAATATAGAAAAGCAACAAGGGCTTATGCCAAAAATAAACAATGC  
GATAATTTAAAAATAAACTTGGGTTAATTGCCCAAGTTTTCAACTCTTCCAATTGTTTTGAATTTCTCAAATTTCAAACATTTTGACATCCATTGCT  
AGGTTTGGGTGACAGATTGACTTGATAAGGAATTTTCGAGCCTTGATAGTTCTCTCTCGAAATGCAGA**GGGAAGGC**AGAGTTCATAGCGAACTCG  
AATGATATCATATACAATAAAGAAAAAGAGAGAATTAACAAGAAGCCATAAATCAACGTCATGCAATTAATTGAAAGTATAATAACATATGT  
AGGTAGTGAAGGTGAATGTAATATAGAAGGAATCATCACTAAGGTTACAATTGAAAGTAATTAGCTTAAAGTAGTTAAATATAAGTAAAGATCA  
TCGGTTGTATAAAAAAGACATTCTGTAACATAAAGCTATAAATAACCTTAACGATAATAAACATTAAGCAGTAAATGAAGAAGAAAAAGAA  
AAAAATTTACTAATTTGTCAGAATGAGGTAACGCCGATGTGAGAATTATTATAGATAAATAGATTCATATATGATAAATCAAAAACAAAACAAA  
AGACCTAATGAACATAAATTTGTTGACGCCAAAATTTGATAGGCCAAACGTAATTTATGAAAAAATATTTTTTTTTTACCAATAGACAAAATTTTTTTTT  
CTAAAAAAAAGTAAAAATTTAATTTAAAGTGTGGCCATAAAAGTCAAGAAGTCCAGCCGAT**GTTTTTTTGGGCTATAAATGCATTTCCGATACAAC**  
**AGCTTCAACACTCACAATACTTCTCACATTTCTCCATTTCTCTGTAATTTCCGGCGACCGGAAAAATTTTCACGATGGACGTTCCGGCGGAGCT**  
**GTAAAAACCCTTGACGCTTCCAAACACATTTCTCCGGAGAACCTCTCAGACCCCAATAACAAGATTCTCTGTTAAAGCTTCAGATGCTTCCATTA**  
**CCGTTGTATCTTACAATGGTTTGTCTTACCATGTTTTCTCTGTATGATTTTCTTCTACACAGATGGCGTGAGAAGATCCGTAATGGAATTTCCA**  
**CTCCACGTGCTCAACTTTTCTGAATTAGTTGCTATCTTTTCGTTGATCGCTTCAAGTTATTTATCTGTTGGGGTTCTTTGGTATTGGGTTTGTCAATCTT**  
**TCGTTTCTAAAGGAAATAATGATTCTTGGGACGTTGAAGTGAACCCCGAGAACAATTTATTGATACAACCTGTTACATCACACCTGTTCCGACGAAA**  
**TATCCCAATGAAATCTGTACCTGTTGATGAAAAAGATGCTCAGATAATCACACCATTTTCGTTAGAGGACGATGAGGTGATTCAAAATCGGTGGTG**  
**GAAGGGAGAATACCATCATATTCAATGGAACTAAGTTGGGTGACTGTAAGAGAGCTGCTTTTATTGAAAAAGAGGCGTTACAGAGGAGTTCAAG**  
**GAAGTCATTGGATGGGTTACCATTAGATGGATTGATTATGAATCAATCTTGGACAGTGTGTGAGATGCCAATGGGTATATTCAAATACCAGTG**  
**GGAAATAGCTGGACCTTTGCTGCTTAATGGGAATGAGTTTTCTGTGCCAATGGCAACCAGAAAGGATGTTAGTTGCTAGTACTAACAGGGGTTGT**  
**AAAGCCATTTATGTTTCCGGTGCCGCTACCAGTGTGTTGTTAGAGATGGGATGACTAGAGCTCCTGTAGTTAGGTTCCGGCAGCGCAAAGAGAGCT**  
**GCAGAGTTGAAGTCTTCTGTCGAGGATACAATGAATTTCCGAGACTCTATCTGTTGATTTCAATAAATCAAGCAGATTTGCCAGATTACAGAACATTC**  
**AATGTGCAATAGCTGGAAGAATCTATACATGAGGTTTAGCTGTAGCACTGGTGACGCGATGGGAATGAACATGGTTTCCAAAGGTGTACAAAAC**  
**GTTCTTGATTACCTCAGAATGAGTACCCGACATGGACATCATTGGCATATCTGGAACTATTGCTCGGACAAGAAACAGCAGCAGTTAATTGG**  
**ATTGAGGGGAGAGGAAAGTCGGTAGTTTGTGAGGCAATCATCAAGGAAGAGGTGGTGAAGAAAGTCTGAAAACAGAGTTGCTGCTCTAGTTG**  
**AGCTGAACATGCTTAAAAACCTCACTGGCTCTGCCATGGCTGGTGCACTTGGTGGCTTCAACGCCCATGCCAGCAATATTGTCTCAGCTGTATATT**  
**AGCCACTGGCCAAGACCCGGCTCAAATAATTGAAAGCTCACTGCATCACTATGATGGAGGCTGTAATGATGGCAAGGACCTCCATATATCCGT**  
**CACCATGCCTTCAA**

### **Supplementary Figure 4. G-boxes and GC-rich motifs found in SGA-related genes.**

The presence of G-boxes (blue), GC-rich motifs (green) and the 5'UTR (pink) present in sense or antisense in the promoter constructs used in the transactivation assays, and the coding sequence (red) are highlighted.

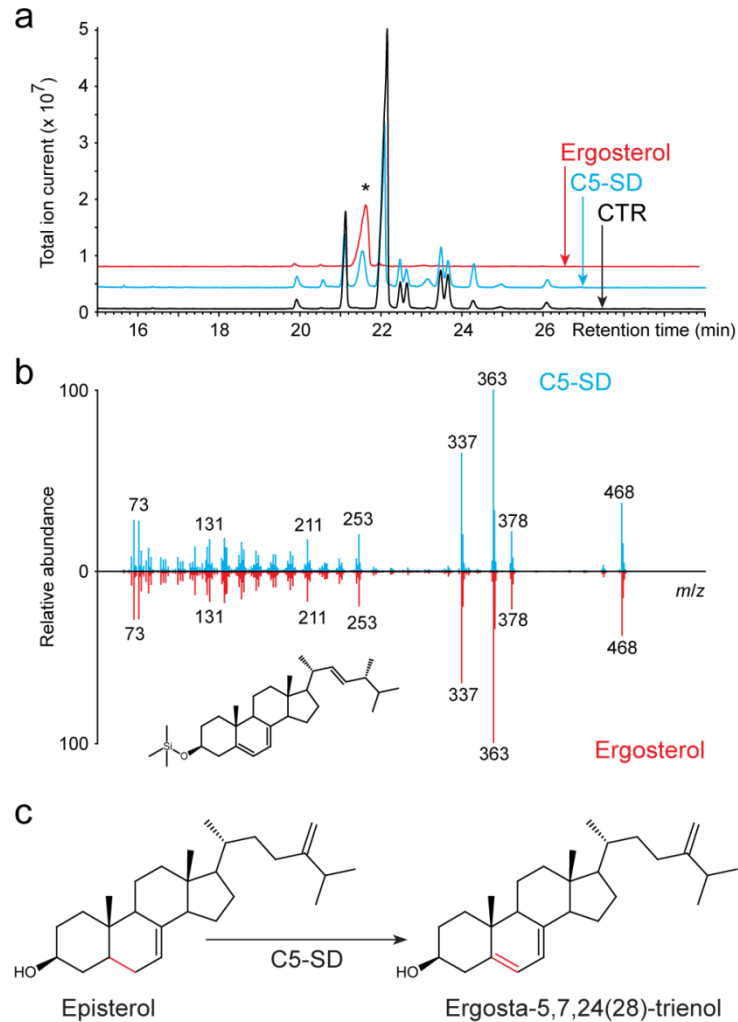

**Supplementary Figure 5.** *C5-SD* complements a *Saccharomyces cerevisiae erg3* null strain.

**(a)** Total ion current GC-MS chromatograms of extracts of *erg3Δ* control yeast (CTR, black) and *erg3Δ* yeast expressing *C5-SD* (*C5-SD*, cyan). The GC-MS chromatogram of an authentic ergosterol standard is also shown (Ergosterol, red). The peak corresponding to ergosterol is indicated with an asterisk.

**(b)** Comparison of the EI-MS spectra of the ergosterol produced in *erg3Δ* yeast expressing *C5-SD* (*C5-SD*, cyan) and an authentic ergosterol standard. Samples were trimethylsilylated prior to GC-MS analysis.

**(c)** Sterol C5 desaturase reaction catalyzed by *C5-SD* in the *S. cerevisiae erg3* null strain.

a

```
St_GAME9 MNIAIDDDDEIFSLPSLDELESITHLLYDD--DSDFFETLSPMSLDSTTLTPNNPTPNSLE
St_GAME9-like1 --MYQQKTTTISDSDLVLENIKFHLVNDSDFSQILSMFDPINISYA-DIINSPNSSYGS
St_GAME9-like2 -----MNPSDFSLLSIQHLLNDSIDPHIFSAIDSNNTPTN-F-----
St_GAME9-like5 ---MNPVDDEIFSSDFDLLESMKQYLLNDFDFSEFFS---PSN--NV-ELPNSPTSSFGS
St_GAME9-like3 ----MNINTKFSLSDFDFVESVKQHLLNDFDFSEYFS---PMNLSNV-ELPNSPNSSLGT
St_GAME9-like4 ----MNINTEFSLSDFDLFLESVKQHLLNDFDFSEYFS---PMNLSNV-ELPNSPNSSLGS
St_GAME9-like6 -----MQGKISLDIEQNFLDTMQYLFNDPDFSQILSEIQTPRQYSTTSD--HQNAIFPI
St_GAME9-like7 -----MEHYFSENSDI-----IFSEISSVN----NNN--NNNITIDS
```

: . : .

```
St_GAME9 S-----P-----VRPEGTKETFVAREHEESAPQDWRRFIVRRRQ
St_GAME9-like1 STSAAEISWGDMITNIDNPQRVDKLEHEEHPKEEPIVARGVH--APGDWNRIRGVRRRQ
St_GAME9-like2 --TQNNFDYGELTPLI-NPSTTLQANEKFEVEESKTVAASVTH--APQDWKRYGVRRRP
St_GAME9-like5 VGNTFLVETPT-----KDQTWGPPVVARDEHHHVPEDDWRRIYGVRRRQ
St_GAME9-like3 SSSIKSK-----EELIKGPMVVAREEN--AWRDWRRIYGVRRRQ
St_GAME9-like4 SPSIESHEKSES-----EVEIKGPMVVTRKH--ASGDWRRIYGVRRRQ
St_GAME9-like6 A-----QNFVQDNIP-----ILQEIEENKESTTLEHRPKKYKGVRRRP
St_GAME9-like7 S-----QILVNHDI-----SPTKLSSTEERHVDAPPSWRRIYGVRRRQ
```

.: : \*\*\*\*\*

```
St_GAME9 WGTFAAEIRDPNRRG-ARLWLGTYESPQDAALAYDQAAYKIRGTKARLNFPDLIGSDVPM
St_GAME9-like1 WGKFAAEIRDPDPRG-ARLWLGTYETPEDAALAYDQAAYKIRGSKARLNFPHLIGSNKSE
St_GAME9-like2 WGKFAAEIRDPKKN-ARLWLGTYETPEDAALAYDQAAYKIRGSKARLNFPHLIGSGVPE
St_GAME9-like5 WGTFAAEIRDPNRKG-ARLWLGTYETPKDAALAYDQAAYKIRGSKARLNFPHLIGSNI SK
St_GAME9-like3 WGTFAAEIRDPDPRG-ARLWLGTYETLKDAALAYD-----RGSKARVNFPHLIGSNMPE
St_GAME9-like4 WGTFAAEIRDPDPRG-ARLWLGTYETPEDAALAYDQAAYKIRGSKARVNFPHLIGSNMPE
St_GAME9-like6 WGKFAAEIRDPERKG-CRLWLGTYETPEDAALAYDRATFKLRGSRVNLFPHLIESNVTE
St_GAME9-like7 WGKFAAEIRDPKRKNRVWLGTYETPEDAALAYDQAAYKIRGSKARLNFPHLIGSNVGD
```

\*\*.:\*\*\*\*\*.: :\*.\*\*\*.\*.: :\*\*\*\*\* \*\*.:\* :\* .\* \*

```
St_GAME9 PPRVTARRRTRSRSPPEPSTTSSSSSS--SSSSSSSSMENGTKRKRIDLINSIAKAKL
St_GAME9-like1 PIRVAPRRRCHPS----ES-----SLVEY-TS----SKKRKL-----
St_GAME9-like2 PARVNPRRRSHSP----ES-----SYENV-TP----RKLYTI-----
St_GAME9-like5 PARVKGSRCLPSP----SS-----SSLSSSTSENGARKRKRIDLINSIAKAKL
St_GAME9-like3 PARLTVRHRTRSP----KP-----SAIS-STSENGTRKRKRIDLINSIAKTNF
St_GAME9-like4 PARLIVRHRTRSP----KP-----SAFS-FTSLENGTRKRKRIDLINSIAKAKA
St_GAME9-like6 INRVPRRRPRSPPEFSSSSSPPPRYVGDNNNESNNNNTDRPSSKRRNVELINSLATVNN
St_GAME9-like7 YNRVYPKRRLNSLDENISIT-----TKTSNNIECSPSPKRRNVELINSIAKAKA
```

\*: : . . : .:

```
St_GAME9 LCGVNLQMLIQM-----
St_GAME9-like1 -----
St_GAME9-like2 -----
St_GAME9-like5 VCHSLIKFTDVGITLSKERSCFSSCLNL
St_GAME9-like3 FCHSYLKGREFSVQILEKYLPO-----
St_GAME9-like4 KANLFVIIRGVKT--ER-----
St_GAME9-like6 -LDGQNIMERCLTSN----YYFA----
St_GAME9-like7 SLNSHCIMERFELGN----LA-----
```



**b**

```
S1_GAME9-like4 -----MQGKISLDTEQNFLDT-MQHLLF-NDSDFSQILSEIQTPRQYST----TPD----
S1_GAME9 MSIVIDDDEIFSLP-SLDELESITHLLYDDSDFFETLSPMSLDVTT--LLPNIPTSNS-
S1_GAME9-like3 ----MNINMKFSLSD-DFDFLESVKQHLL-NDFDFFKYFSPMNLNNVE---LPNSAISLGL
S1_GAME9-like1 --MYQQKSTTISDS-DLSVLENIKFHLV-NDSDFSQILSMFDPINISHADIINSPSSYG
S1_GAME9-like2 -----MNPS-DFSLLSQIQHLL-NDSDFPNIFSAIDSNNTPTDF-----
                :. . . *:. * :* ** ::* :.

S1_GAME9-like4 ---HQNAIAQ-DN---IPILLQ-----EIEENK--ESTTRLSEH---RPKKYKGVRRRPW
S1_GAME9 -----IESP-----VTPEETK--EP-SVACEDAPQDWRRFIVRRRQW
S1_GAME9-like3 SSSLIESH-----EKFYEYEEI IKGPNMVVARQKNTPEDWRRYIGVRRRQW
S1_GAME9-like1 SSTSAAEISWGDMITNIDSPWQCIDKLEHEEAPKKEEPLVARGVHAPGDWNRVYRGVRRRPW
S1_GAME9-like2 ---TQNNFDYGELTPLINSS-TTLQANEKSEVEESETVVASVKHAPKDWKRYRGVRRRPW
                . : . :. :**** *

S1_GAME9-like4 GKFAAEIRDPERKGCRLWLGTYETPEDAALAYDRTAFLRGRSKAVLNFPFLIETNVTEIN
S1_GAME9 GTFSAEIRDPNRRGARLWLGTYESPRDAALAYDQAAYKIRGTKVRLNFPDLIGSDVPMPP
S1_GAME9-like3 GTFTAEIRDPNKKGARLWLGTYETPEDAALAYDQAAYKIRGSRARVNFPHLIGSNMPKPA
S1_GAME9-like1 GKFAAEIRDPRKGARLWLGTYGT PEDAALAYDQAAYKIRGSKARLNFPFLIGSDI SEPV
S1_GAME9-like2 GKFAAEIRDPKKNARLWLGTYETPEDAALAYDQAAYKIRGSKARLNFPFLIGSGVPEPA
*.:*****: .***** .*.*****:*****:***.** : :

S1_GAME9-like4 RVRPRRRRSPPEFSSSSPPPPPPYVDESNNNTDGSISKRRNVELINSLATVNNLDCQ
S1_GAME9 RVTARRRTRSRSRSPPEPLTTSSSSSSSSSSSSSSSENGTKKRKIDLINSIAKSK-LLCG
S1_GAME9-like3 RLKVRHHTSSLKPS-----FSSTSLKNGIRKKK-----
S1_GAME9-like1 RVAPRKRCHSSQSSL-----V-----EYTSKKRKL-----
S1_GAME9-like2 RVNPRRRRSHSPESC-----E-----NGTPRKLYFI-----
*: *.: * . * . :

S1_GAME9-like4 NIMEKYLTSDYIFA
S1_GAME9 MDLQMLIQM-----
S1_GAME9-like3 -----
S1_GAME9-like1 -----
S1_GAME9-like2 -----
```

**Supplementary Figure 6.** Sequence alignment of GAME9 and GAME9-like proteins. Full sequences were aligned with Clustal Omega. The serine-rich C-terminal domain is highlighted in green in GAME9 of potato (a) and tomato (b).

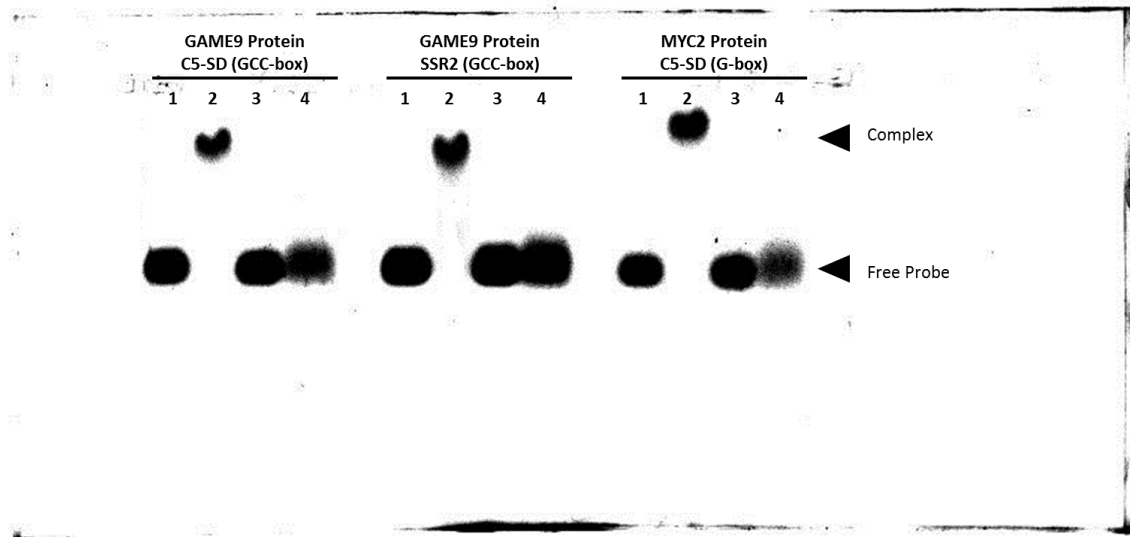

**Supplementary Figure 7.** *In vitro* binding of the GAME9 and SIMYC2 proteins to the G- and GCC-boxes located in the promoters of the *C5-SD* and *SSR2* genes.

Electrophoretic mobility shift assays (EMSA) were performed with probes containing a GCC- or a G-box were separated on a 1% agarose gel without additional treatment (lane 1) or with 200 ng of the purified protein (lane 2). Controls: a sequence containing a mutated version of the box was loaded (lane 3) and incubated with protein (lane 4).

**Supplementary Table 1.** Details of homologs co-expressed with *GAME9* in both tomato and potato presented in Fig. 1.

| <b>Annotation</b>                                      | <b>Solyc ID (tomato)</b>    | <b>Sotub ID (potato)</b>    |
|--------------------------------------------------------|-----------------------------|-----------------------------|
| GAME12 (Aminotransferase-like protein)                 | Solyc12g006470 <sup>a</sup> | Sotub12g011080 <sup>a</sup> |
| GAME4 (CYP88D)                                         | Solyc12g006460 <sup>a</sup> | Sotub12g011090 <sup>a</sup> |
| GAME6 (CYP72A)                                         | Solyc07g043460 <sup>b</sup> | Sotub07g016580 <sup>b</sup> |
| GAME1 (UDP-galactosyltransferase)                      | Solyc07g043490 <sup>b</sup> | Sotub07g016600 <sup>b</sup> |
| GAME11 (2-oxoglutarate-dependent dioxygenase)          | Solyc07g043420 <sup>b</sup> | Sotub07g016570 <sup>b</sup> |
| Cellulose synthase                                     | Solyc07g043390 <sup>b</sup> | Sotub07g016530 <sup>b</sup> |
| SSR2 (Sterol side chain reductase 2)                   | Solyc02g069490              | Sotub02g015720              |
| Phylloplanin                                           | Solyc01g066680              | Sotub01g020750              |
| DNA topoisomerase 2                                    | Solyc01g087500              | Sotub01g025950              |
| F-box family protein                                   | Solyc01g104230              | Sotub01g041250              |
| Unknown protein                                        | Solyc01g106540              | Sotub01g043720              |
| Subtilisin-like serine protease                        | Solyc02g069630              | Sotub02g015850              |
| Ascorbate peroxidase                                   | Solyc02g083630              | Sotub02g026940              |
| Male sterility 5 family protein                        | Solyc02g083640              | Sotub02g026950              |
| Laccase                                                | Solyc02g085110              | Sotub02g028260              |
| Laccase                                                | Solyc02g085120              | Sotub02g028270              |
| Genomic DNA chromosome 5 P1 clone MSI17                | Solyc02g086140              | Sotub02g029290              |
| Microtubule-associated protein MAP65-1a                | Solyc03g007130              | Sotub11g029000              |
| Leucine-rich repeat receptor-like protein kinase       | Solyc03g083510              | Sotub03g020030              |
| E2F transcription factor-like protein                  | Solyc03g113760              | Sotub03g027120              |
| Tubby-like protein 13                                  | Solyc03g117730              | Sotub03g031190              |
| Kinesin-like protein                                   | Solyc04g076310              | Sotub04g029340              |
| Cyclin A-like protein                                  | Solyc04g078310              | Sotub04g031250              |
| Pollen allergen Phl p 11                               | Solyc05g051870              | Sotub05g024500              |
| Glucosyltransferase                                    | Solyc05g053400              | Sotub05g026070              |
| Os03g0291800 protein                                   | Solyc06g050920              | Sotub06g011200              |
| Cyclin-dependent protein kinase regulator-like protein | Solyc06g065680              | Sotub06g024730              |
| Genomic DNA chromosome 5 TAC clone K19B1               | Solyc06g070970              | Sotub06g026960              |
| Leucine-rich repeat receptor-like protein kinase PEPR2 | Solyc06g084420              | Sotub06g034920              |
| Dopamine beta-monooxygenase                            | Solyc07g048050              | Sotub07g018160              |
| LRR receptor-like serine/threonine-protein kinase      | Solyc08g061560              | Sotub08g014090              |
| Pectinesterase                                         | Solyc08g078640              | Sotub08g024430              |
| Os04g0690100 protein                                   | Solyc08g079010              | Sotub08g024870              |
| Alpha-hydroxynitrile lyase                             | Solyc09g014970              | Sotub09g012700              |
| Cyclin A1                                              | Solyc11g005090              | Sotub11g013250              |
| Superoxide dismutase                                   | Solyc11g066390              | Sotub11g024220              |
| Genomic DNA chromosome 5 P1 clone MUP24                | Solyc11g069420              | Sotub11g026580              |

<sup>a,b</sup>Genes localized in clusters on chromosome 12 and 7, respectively, previously associated with SGA biosynthesis.

**Supplementary Table 2.** Changes in expression of genes involved in the biosynthesis of SGAs and sterol precursors in potato *GAME9-Ox* leaves determined by RNA-Seq analyses.

| <b>Process</b>                    | <b>Gene</b>               | <b>Id</b>      | <b>Description</b>                         | <b>Change</b> |
|-----------------------------------|---------------------------|----------------|--------------------------------------------|---------------|
| <u>Regulation</u>                 | <i>GAME9</i>              | Sotub01g029510 | Ethylene responsive transcription factor   | ↑             |
| <u>SGA biosynthesis (Chr 7)</u>   | <i>GAME2</i>              | Sotub07g016550 | UDP-rhamnosyltransferase                   | ↑             |
|                                   | <i>GAME11</i>             | Sotub07g016570 | 2-oxoglutarate-dependent dioxygenase       | ↑             |
|                                   | <i>GAME6</i>              | Sotub07g016580 | Cytochrome P450 72A188                     | ↑             |
|                                   | <i>GAME1</i>              | Sotub07g016600 | UDP-galactosyltransferase                  | ↑             |
| <u>SGA biosynthesis (Chr 12)</u>  | <i>GAME12</i>             | Sotub12g011080 | Aminotransferase-like protein              | ↑             |
|                                   | <i>GAME4</i>              | Sotub12g011090 | Cytochrome P450 88D                        | ↑             |
| <u>Biosynthesis of precursors</u> | <i>HMGR</i> <sup>*a</sup> | Sotub02g025630 | 3-Hydroxy-3-methylglutaryl CoA reductase 1 | No change     |
|                                   | <i>SQS</i> <sup>*a</sup>  | Sotub01g047720 | Squalene synthase                          | No change     |
|                                   | <i>CAS1</i>               | Sotub04g023080 | Cycloartenol synthase                      | ↑             |
|                                   | <i>TTS1</i> <sup>*b</sup> | Sotub12g010880 | $\beta$ -amyrin synthase                   | No change     |
|                                   | <i>SMT1</i> <sup>*a</sup> | Sotub01g025880 | Sterol C24-methyltransferase type1         | No change     |
|                                   | <i>SSR2</i> <sup>*c</sup> | Sotub02g015720 | Sterol side chain reductase 2              | ↑             |

Identified by <sup>\*a</sup>Ginzberg *et al.*<sup>35</sup>, <sup>\*b</sup>Wang *et al.*<sup>39</sup> and <sup>\*c</sup>Sawai *et al.*<sup>19</sup>

Genes are grouped according to their association with SGA biosynthesis or synthesis of precursors. Change is indicated when increase (↑) in gene expression was found as compared to wild-type potato plants.

**Supplementary Table 3.** Changes in expression of genes involved in the biosynthesis of SGAs and precursors in tomato *GAME9*-RNAi and *GAME9*-Ox leaves as determined by RNA-Seq analyses.

| Process                             | Gene                      | Id             | Description                              | RNAi      | Ox        |
|-------------------------------------|---------------------------|----------------|------------------------------------------|-----------|-----------|
| <u>Regulation</u>                   | <i>GAME9</i>              | Solyc01g090340 | Ethylene responsive transcription factor | ↓         | ↑         |
| <u>SGA biosynthesis</u><br>(Chr 7)  | <i>GAME2</i>              | Solyc07g043410 | UDP-xylosyltransferase                   | No change | No change |
|                                     | <i>GAME11</i>             | Solyc07g043420 | 2-oxoglutarate-dependent dioxygenase     | ↓         | ↑         |
|                                     | <i>GAME6</i>              | Solyc07g043460 | Cytochrome P450 72A188                   | ↓         | ↑         |
|                                     | <i>GAME17</i>             | Solyc07g043480 | UDP-glucosyltransferase                  | ↓         | ↑         |
|                                     | <i>GAME1</i>              | Solyc07g043490 | UDP-galactosyltransferase                | ↓         | ↑         |
|                                     | <i>GAME18</i>             | Solyc07g043500 | UDP-glucosyltransferase                  | ↓         | ↑         |
| <u>SGA biosynthesis</u><br>(Chr 12) | <i>GAME12</i>             | Solyc12g006470 | Aminotransferase-like protein            | ↓         | ↑         |
| <u>Biosynthesis of precursors</u>   | <i>SQS</i> <sup>*a</sup>  | Solyc01g110290 | Squalene synthase                        | No change | No change |
|                                     | <i>TTS1</i> <sup>*b</sup> | Solyc12g006530 | $\beta$ -amyrin synthase                 | No change | No change |
|                                     | <i>TTS2</i> <sup>*b</sup> | Solyc12g006520 | $\beta$ -amyrin synthase                 | No change | No change |
|                                     | <i>SSR2</i> <sup>*c</sup> | Solyc02g069490 | Sterol side chain reductase 2            | ↓         | ↑         |

Identified by <sup>\*a</sup>Ginzberg *et al.*<sup>35</sup>, <sup>\*b</sup>Wang *et al.*<sup>39</sup> and <sup>\*c</sup>Sawai *et al.*<sup>19</sup>

Genes are grouped according to their association with SGA biosynthesis or synthesis of precursors. Change is indicated when increase (↑) or decrease (↓) in gene expression was found in comparison to wild-type tomato plants.

**Supplementary Table 4.** A set of 27 genes (including *GAME9*) found in common between the down- and upregulated genes in the *GAME9*-RNAi and *GAME9*-Ox tomato lines, respectively.

| <b>Solyc ID</b>             | <b>Annotation</b>                                                    |
|-----------------------------|----------------------------------------------------------------------|
| Solyc01g090340              | Ethylene responsive transcription factor ( <i>GAME9</i> )            |
| Solyc07g043490 <sup>a</sup> | UDP-galactosyltransferase ( <i>GAME1</i> ) <sup>b</sup>              |
| Solyc07g043480 <sup>a</sup> | UDP-glucosyltransferase ( <i>GAME17</i> ) <sup>c</sup>               |
| Solyc07g043420 <sup>a</sup> | 2-oxoglutarate-dependent dioxygenase ( <i>GAME11</i> ) <sup>b</sup>  |
| Solyc07g043460 <sup>a</sup> | CYP72A ( <i>GAME6</i> ) <sup>b</sup>                                 |
| Solyc07g043500 <sup>a</sup> | UDP-glucosyltransferase ( <i>GAME18</i> ) <sup>c</sup>               |
| Solyc02g069490              | Sterol side chain reductase 2 ( <i>SSR2</i> ) <sup>b</sup>           |
| Solyc02g086180              | $\Delta(7)$ -sterol-C5(6)-desaturase ( <i>C5-SD</i> ) <sup>c</sup>   |
| Solyc06g005750              | Methylsterol monooxygenase 2-2-like ( <i>SMO1</i> ) <sup>c</sup>     |
| Solyc01g073640              | 3- $\beta$ -hydroxysteroid dehydrogenase ( <i>OXR</i> ) <sup>c</sup> |
| Solyc10g008410              | E3 ubiquitin-protein ligase RMA1H1-like ( <i>UBL</i> ) <sup>b</sup>  |
| Solyc07g043390 <sup>a</sup> | Cellulose synthase <sup>b</sup>                                      |
| Solyc09g018660              | Unknown protein                                                      |
| Solyc03g051690              | Alcohol dehydrogenase (fragment)                                     |
| Solyc10g074660              | Unknown protein                                                      |
| Solyc12g032960              | Photosystem I P700 chlorophyll a apoprotein                          |
| Solyc09g074480              | Unknown protein                                                      |
| Solyc09g009070              | Repressor of silencing 1                                             |
| Solyc01g017320              | Photosystem I P700 chlorophyll a apoprotein A1                       |
| Solyc06g009950              | Photosystem I P700 chlorophyll a apoprotein A2                       |
| Solyc03g078030              | Unknown protein                                                      |
| Solyc02g036320              | Photosystem I P700 chlorophyll a apoprotein                          |
| Solyc05g007830              | Expansin 2                                                           |
| Solyc04g007480              | Unknown Protein                                                      |
| Solyc06g074590              | Ycf2                                                                 |
| Solyc01g007390              | Unknown protein                                                      |
| Solyc12g056290              | Unknown protein                                                      |

<sup>a</sup>Genes localized in the chromosome 7 SGAs gene cluster.

<sup>b</sup>Genes co-expressed with *GAME9* in potato and tomato.

<sup>c</sup>Genes co-expressed with *GAME9* in tomato.

**Supplementary Table 5.** Details of promoters tested in tobacco protoplast transfection assays for transactivation by GAME9.

| <b>Gene Symbol</b> | <b>Annotation</b>                    | <b>Solyc ID</b> | <b>Size cloned</b> |
|--------------------|--------------------------------------|-----------------|--------------------|
| GAME1              | UDP-galactosyltransferase            | Solyc07g043490  | ~2600 bp           |
| GAME2              | UDP-xylosyltransferase               | Solyc07g043410  | ~2300 bp           |
| GAME4              | CYP88D                               | Solyc12g006460  | ~2600 bp           |
| GAME6              | CYP72A                               | Solyc07g043460  | ~2600 bp           |
| GAME7              | CYP72A                               | Solyc07g062520  | ~2700 bp           |
| GAME17             | UDP-glucosyltransferase              | Solyc07g043480  | ~1900 bp           |
| GAME18             | UDP-glucosyltransferase              | Solyc07g043500  | ~1550 bp           |
| HMGR1              | HMG CoA reductase 1                  | Solyc03g032010  | ~1500 bp           |
| HMGR2              | HMG CoA reductase 2                  | Solyc03g032020  | ~1500 bp           |
| SQMO               | Squalene monooxygenase               | Solyc04g077440  | ~1200 bp           |
| SMO1               | Methylsterol monooxygenase 2-2-like  | Solyc06g005750  | ~2250 bp           |
| C5-SD              | $\Delta(7)$ -sterol-C5(6)-desaturase | Solyc02g086180  | ~1600 bp           |

For each gene, a region spanning ~1200-2700 bp was cloned and used for transactivation in tobacco protoplasts.

**Supplementary Table 6.** Oligonucleotides used in this study.

|                       | <b>Name</b>        | <b>Sequence</b>                                                  | <b>Use</b>                       |         |
|-----------------------|--------------------|------------------------------------------------------------------|----------------------------------|---------|
| <u>C5-SD promoter</u> | C5SD_Fw3           | <u>GGGGACAAGTTTGTACAAAAAAGCAGGCTTAAATCTTC</u><br>GCAAAATAATAGATA | Deletion<br>C5-SD d3             |         |
|                       | C5SD_Rv1           | <u>GGGGACCACTTTGTACAAGAAAGCTGGGTACTCCGACG</u><br>GTATACTAGGTA    | Deletion<br>C5-SD d3             |         |
|                       | C5SD_Fw4           | <u>GGGGACAAGTTTGTACAAAAAAGCAGGCTTAGAAACAT</u><br>GACAAGGTGAATTC  | Deletion<br>C5-SD d4             |         |
|                       | C5SD_Rv1           | <u>GGGGACCACTTTGTACAAGAAAGCTGGGTACTCCGACG</u><br>GTATACTAGGTA    | Deletion<br>C5-SD d4             |         |
|                       | C5SD_Fw6           | <u>GGGGACAAGTTTGTACAAAAAAGCAGGCTTAAATCTTTT</u><br>GCCAGTTTAGCTC  | Deletion<br>C5-SD d6             |         |
|                       | C5SD_Rv1           | <u>GGGGACCACTTTGTACAAGAAAGCTGGGTACTCCGACG</u><br>GTATACTAGGTA    | Deletion<br>C5-SD d6             |         |
|                       | C5SD_Fw7           | <u>GGGGACAAGTTTGTACAAAAAAGCAGGCTTAGGAGTAG</u><br>TAGTCCAAAATGG   | Deletion<br>C5-SD d7             |         |
|                       | C5SD_Rv1           | <u>GGGGACCACTTTGTACAAGAAAGCTGGGTACTCCGACG</u><br>GTATACTAGGTA    | Deletion<br>C5-SD d7             |         |
|                       | C5SD_Fw5           | <u>GGGGACAAGTTTGTACAAAAAAGCAGGCTTACACATGC</u><br>ATATATTGTGTTACC | Deletion<br>C5-SD d5             |         |
|                       | C5SD_Rv1           | <u>GGGGACCACTTTGTACAAGAAAGCTGGGTACTCCGACG</u><br>GTATACTAGGTA    | Deletion<br>C5-SD d5             |         |
|                       | C5SD_Fw4           | <u>GGGGACAAGTTTGTACAAAAAAGCAGGCTTAGAAACAT</u><br>GACAAGGTGAATTC  | Deletion<br>C5-SD d8             |         |
|                       | C5SD_Rv2           | <u>GGGGACCACTTTGTACAAGAAAGCTGGGTATAGTGCGG</u><br>TAACACAATATATG  | Deletion<br>C5-SD d8             |         |
|                       | C5SD_Fw6           | <u>GGGGACAAGTTTGTACAAAAAAGCAGGCTTAAATCTTTT</u><br>GCCAGTTTAGCTC  | Deletion<br>C5-SD d9             |         |
|                       | C5SD_Rv2           | <u>GGGGACCACTTTGTACAAGAAAGCTGGGTATAGTGCGG</u><br>TAACACAATATATG  | Deletion<br>C5-SD d9             |         |
|                       | Gbox_Fw            | CAGTTTAGCTCACCACACAAatgtgaGGAGTAGTAGTCCAA<br>AATGG               | Mutation<br>mG-box               |         |
|                       | Gbox_Rv            | CCATTTGGACTACTACTCCtcacafTTGTGTGGTGAGCTAA<br>ACTG                | Mutation<br>mG-box               |         |
|                       | GCC_Fw             | GAATCAATTTTCATTAATATCgattacagtcACATGCATATAT<br>TGTGTTAC          | Mutation<br>mGCC-box             |         |
|                       | GCC_Rv             | GTAACACAATATATGCATGTgactgtaatcGTATTTAATGAAA<br>ATTGATTC          | Mutation<br>mGCC-box             |         |
|                       | <u>Potato</u>      | NAC-Fw                                                           | ATATAGAGCTGGTGATGACT             | qRT-PCR |
|                       |                    | NAC-Rv                                                           | TCCATGATAGCAGAGACTA              | qRT-PCR |
| GAME9-Fw              |                    | AAGCCGCTTACAAGATTCGG                                             | qRT-PCR (also used in<br>tomato) |         |
| GAME9-Rv              |                    | ACGACGCCTAGCCGTTACTC                                             | qRT-PCR (also used in<br>tomato) |         |
| CAS-Fw                |                    | AATCATGACGGTCACTGGGCT                                            | qRT-PCR                          |         |
| CAS-Rv                |                    | AATACTGCATTGAGTGCCCCC                                            | qRT-PCR                          |         |
| SMT1-Fw               |                    | GCTTTGCTGTGTATGAGTGG                                             | qRT-PCR                          |         |
| SMT1-Rv               |                    | TTTTGTGTCGATCGAATCTC                                             | qRT-PCR                          |         |
| SSR2-Fw               |                    | CCACCGTTCACCCTAGGAGG                                             | qRT-PCR                          |         |
| SSR2-Rv               |                    | ATACAAGAACGAGAATGGAAGGACA                                        | qRT-PCR                          |         |
| GAME11-Fw             |                    | TGGCGGACCTTCTTTCAAACCT                                           | qRT-PCR                          |         |
| GAME11-Rv             |                    | CACAATTTCAACTGGATCCGATG                                          | qRT-PCR                          |         |
| GAME6-Fw              |                    | TTTGCCGATGTTTGCCTT                                               | qRT-PCR                          |         |
| GAME6-Rv              | TTCCTTGCTGCCGCAGTT | qRT-PCR                                                          |                                  |         |



|               |                                                                  |                                              |
|---------------|------------------------------------------------------------------|----------------------------------------------|
| GAME4-Fw      | GGGACTCAAGGCTCGAAAAGTACT                                         | qRT-PCR                                      |
| GAME4-Rv      | TGTTTGCCCTTGGCATTGAT                                             | qRT-PCR                                      |
| GAME12-Fw     | GGAATGGCCAAGACTACTAATGGA                                         | qRT-PCR                                      |
| GAME12-Rv     | GCTCTATCTATAACTAAAGGTCCCATA                                      | qRT-PCR                                      |
| GAME1-Fw      | TGGGTCCCACAGCTTACGATC                                            | qRT-PCR                                      |
| GAME1-Rv      | GGCACGCCAAAAGTGATGG                                              | qRT-PCR                                      |
| GAME2-Fw      | GAAACTGCAATGCCGCATGT                                             | qRT-PCR                                      |
| GAME2-Rv      | TTGAGGCCATGGAGGGC                                                | qRT-PCR                                      |
| C5-SD Fw      | TCATCTCCGGTTTCCTCTGGT                                            | qRT-PCR                                      |
| C5-SD Rv      | TTGCAAGAGCATTGCTTCCTTT                                           | qRT-PCR                                      |
| GAME9-Ox-Fw   | GGGGACAAGTTTGTACAAAAAAGCAGGCTATGAATATT<br>GCAATTGATGATGATGA      | Cloning GAME9 for Ox                         |
| GAME9-Ox-Rv   | GGGGACCACTTTGTACAAGAAAGCTGGGTTTCATTTGTAT<br>CAACATTTGTAAATTCACAC | Cloning GAME9 for Ox                         |
| GAME9-RNAi-Fw | AAAAAGCGGCCGCATGAGTATTGTAATTGATGATGATG<br>AAATC                  | Cloning GAME9 for RNAi (also used in tomato) |
| GAME9-RNAi-Rv | AAAAAGGCGCGCCACACGCCACAGATGGTTCTT                                | Cloning GAME9 for RNAi (also used in tomato) |

Tomato

|             |                                                                 |                      |
|-------------|-----------------------------------------------------------------|----------------------|
| TIP41-Fw    | AGATGAACTGGCAGATAATGG                                           | qRT-PCR              |
| TIP41-Rv    | CATCAACCCTAAGCCAGAAA                                            | qRT-PCR              |
| HMGR-Fw     | CTGACGCGCTTCCACTCC                                              | qRT-PCR              |
| HMGR-Rv     | GATCTTCTCACGCCACCTTACG                                          | qRT-PCR              |
| SSR2-Fw     | GGCCAAATGTCAAGGGTCACT                                           | qRT-PCR              |
| SSR2-Rv     | ACCCCGAACCATTGATCA                                              | qRT-PCR              |
| GAME11-Fw   | TGGTCCTGAGAATCCTCCACA                                           | qRT-PCR              |
| GAME11-Rv   | GCTCCAATGAAGCGTGGTACAC                                          | qRT-PCR              |
| GAME4-Fw    | CTTCAATGTGTGGTGATCCAAAA                                         | qRT-PCR              |
| GAME4-Rv    | CCATAATTGTTGGCTTCCAAA                                           | qRT-PCR              |
| GAME12-Fw   | TATGACTGCCGGTCTCTCCG                                            | qRT-PCR              |
| GAME12-Rv   | GATAGTTCCAATAATGAGGGCAATCA                                      | qRT-PCR              |
| GAME17-Fw   | GCTGCAGGATTCCTATTCCAC                                           | qRT-PCR              |
| GAME17-Rv   | TACTTAGCATGGTGCTCCAC                                            | qRT-PCR              |
| C5-SD Fw    | TCATCTCCGGTTTCCTCTGGT                                           | qRT-PCR              |
| C5-SD Rv    | TTGCAACAGCATTGCTTGCT                                            | qRT-PCR              |
| GAME9-Ox-Fw | GGGGACAAGTTTGTACAAAAAAGCAGGCTATGAGTATT<br>GTAATTGATGATGATGAAATC | Cloning GAME9 for Ox |
| GAME9-Ox-Rv | GGGGACAAGTTTGTACAAAAAAGCAGGCTATGAGTATT<br>GTAATTGATGATGATGAAATC | Cloning GAME9 for Ox |
| C5-SD-Fw    | GTGCATGATTTGCACTCAAGGATG                                        | VIGS                 |
| C5-SD-Rv    | CCACCATAACATGGTGACAATGTG                                        | VIGS                 |
| C5-SD-Fw    | GGGGACAAGTTTGTACAAAAAAGCAGGCTATGGAGGAT<br>TACTTGAAGCTATTTCG     | Yeast expression     |
| C5-SD-Rv    | GGGGACCACTTTGTACAAGAAAGCTGGGTTTACATTTTC<br>TTGGCATCCTCTTC       | Yeast expression     |

---

The underlined sequences correspond to the gateway sequence. The sequences in lowercase represent the mutated G- or GCC-boxes.

**Supplementary Table 7.** Probes used for electrophoretic mobility shift assays.

|                                                |                 |                                                         |
|------------------------------------------------|-----------------|---------------------------------------------------------|
| C5-SD (GCC-box)                                | C5-SD Fw        | AATCAATTTTCATTAAATACAGCCTGCCACACATGCAT<br>ATATTGTGTTA   |
|                                                | C5-SD Rv        | TAACACAATATATGCATGTGTGGCAGGCTGTATTTAAT<br>GAAAATTGATT   |
| C5-SD (mutated<br>GCC-box)<br>Negative Control | C5-SD NTC<br>Fw | AATCAATTTTCATTAAATACATCTTTTGCCACATGCAT<br>ATATTGTGTTA   |
|                                                | C5-SD NTC<br>Rv | TAACACAATATATGCATGTGGCAAAGATGTATTTAAT<br>GAAAATTGATT    |
| SSR2 (GCC-box)                                 | SSR2 Fw         | GTGGGGGCGTTTGATTGGTAGGCTAAATGGTGGGCTA<br>AAGATATAAATCAC |
|                                                | SSR2 Rv         | GTGATTTATATCTTTAGCCACCATTAGCCTACCAAT<br>CAAACGCCCCCAC   |
| SSR2 (mutated<br>GCC-box)<br>Negative Control  | SSR2 NTC Fw     | GTGGGGGCGTTTGATATCTTTTGCAAATCTTTTGCAA<br>AGATATAAATCAC  |
|                                                | SSR2 NTC Rv     | GTGATTTATATCTTTGCAAAGATTTTGCAAAGATAT<br>CAAACGCCCCCAC   |
| C5-SD (G-box)                                  | G-box Fw        | TAGCTCACCACACAACACGTGGGAGTAGTAGTCCAA                    |
|                                                | G-box Rv        | TTGGACTACTACTCCACGTGTTGTGTGGTGAGCTA                     |
| C5-SD (mutated G-<br>box) Negative<br>Control  | G-box NTC<br>Fw | TAGCTCACCACACAAAAAAGGAGTAGTAGTCCAA                      |
|                                                | G-box NTC<br>Rv | TTGGACTACTACTCCTTTTTTTTGTGTGGTGAGCTA                    |

The underlined sequences correspond to the GCC- and G-boxes.

**Supplementary Table 8.** Accession numbers for ERF proteins used in the phylogenetic analysis presented in Fig. 2.

| <b>Name in Figure 2</b> | <b>Organism</b>             | <b>Accession number</b> |
|-------------------------|-----------------------------|-------------------------|
| Sl_GAME9-like1          | <i>Solanum lycopersicum</i> | Solyc01g090300          |
| Sl_GAME9-like2          | <i>Solanum lycopersicum</i> | Solyc01g090310          |
| Sl_GAME9-like3          | <i>Solanum lycopersicum</i> | Solyc01g090320          |
| Sl_GAME9                | <i>Solanum lycopersicum</i> | Solyc01g090340          |
| Sl_GAME9-like4          | <i>Solanum lycopersicum</i> | Solyc01g090370          |
| St_GAME9-like1          | <i>Solanum tuberosum</i>    | PGSC0003DMG400026049    |
| St_GAME9-like2          | <i>Solanum tuberosum</i>    | PGSC0003DMG400041045    |
| St_GAME9-like3          | <i>Solanum tuberosum</i>    | PGSC0003DMG400025991    |
| St_GAME9-like4          | <i>Solanum tuberosum</i>    | PGSC0003DMG400046672    |
| St_GAME9                | <i>Solanum tuberosum</i>    | PGSC0003DMG400025989    |
| St_GAME9-like5          | <i>Solanum tuberosum</i>    | PGSC0003DMG400026048    |
| St_GAME9-like6          | <i>Solanum tuberosum</i>    | PGSC0003DMG400026046    |
| St_GAME9-like7          | <i>Solanum tuberosum</i>    | PGSC0003DMG400040573    |
| Nt_ERF189               | <i>Nicotiana tabacum</i>    | ERF189                  |
| Nt_ERF115               | <i>Nicotiana tabacum</i>    | ERF115                  |
| Nt_ERF179               | <i>Nicotiana tabacum</i>    | ERF179                  |
| Nt_ERF168               | <i>Nicotiana tabacum</i>    | ERF168                  |
| Nt_ERF221/ORC1          | <i>Nicotiana tabacum</i>    | ERF221                  |
| Nt_ERF104               | <i>Nicotiana tabacum</i>    | ERF104                  |
| Nt_ERF17                | <i>Nicotiana tabacum</i>    | ERF17                   |
| Cr_ORCA1                | <i>Catharanthus roseus</i>  | AJ238739                |
| Cr_ORCA2                | <i>Catharanthus roseus</i>  | AJ238740                |
| Cr_ORCA3                | <i>Catharanthus roseus</i>  | EU072424                |
| Sl_SHN3                 | <i>Solanum lycopersicum</i> | XP_004240977.1          |
| Sl_SHN1                 | <i>Solanum lycopersicum</i> | XP_004235965.1          |
| At_SHN1                 | <i>Arabidopsis thaliana</i> | At1g15360               |
| At_SHN2                 | <i>Arabidopsis thaliana</i> | At5g11190               |
| At_SHN3                 | <i>Arabidopsis thaliana</i> | At5g25390               |
| Sl_ERF1                 | <i>Solanum lycopersicum</i> | AAL75809                |
| Os_SHN1                 | <i>Oryza sativa</i>         | BAD15859                |
| At_ERF1                 | <i>Arabidopsis thaliana</i> | At4g17500               |
| At_DREB1A               | <i>Arabidopsis thaliana</i> | At4g25480               |
| At_DREB1B               | <i>Arabidopsis thaliana</i> | At4g25490               |
| At_DREB1C               | <i>Arabidopsis thaliana</i> | At4g25470               |
| At_DREB2A               | <i>Arabidopsis thaliana</i> | At5g05410               |
| At_DREB2B               | <i>Arabidopsis thaliana</i> | At3g11020               |
| Sl_AP2a                 | <i>Solanum lycopersicum</i> | ACD62792                |
| Sl_AP2b                 | <i>Solanum lycopersicum</i> | HQ586952                |
| Sl_AP2c                 | <i>Solanum lycopersicum</i> | HQ586951                |
| Sl_AP2d                 | <i>Solanum lycopersicum</i> | HQ586953                |

|         |                             |            |
|---------|-----------------------------|------------|
| Sl_AP2e | <i>Solanum lycopersicum</i> | HQ586954   |
| At_ANT  | <i>Arabidopsis thaliana</i> | Q38914     |
| At_TOE2 | <i>Arabidopsis thaliana</i> | Q9LVG2     |
| At_WRI1 | <i>Arabidopsis thaliana</i> | AY254038   |
| At_AP2  | <i>Arabidopsis thaliana</i> | At4g369200 |
| Bn_BBM1 | <i>Brassica napus</i>       | AF317904   |
| Bn_BBM2 | <i>Brassica napus</i>       | AF317905   |
| At_PLT1 | <i>Arabidopsis thaliana</i> | At3g20840  |

---

Sequence data can be found in GenBank/EMBL data libraries, Sol Genomics Network or in the tobacco transcription factors (TOBFAC) database, respectively.
